# Supplementary material
Source: HighWire-hosted journal article supplement (https://bmjopen.bmj.com/content/9/6/e027356)

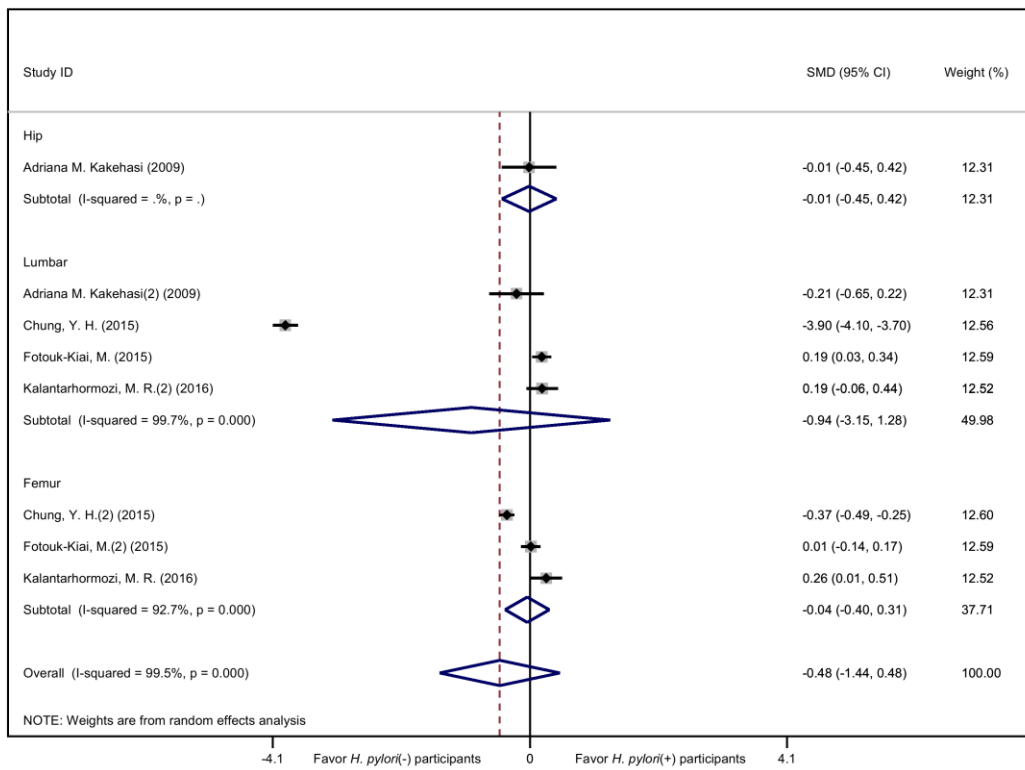

Meta-analysis of SMD according to detection locations.

Supplement: inline-supplementary-material-2 [file inline-supplementary-material-2.pdf]
